# Supplementary material for: Piezophototronic gated optofluidic logic computations empowering intrinsic reconfigurable switches
Source: PubMed Central journal article supplement (PMC6763476; doi:10.1038/s41467-019-12148-y), 2019-09-26
Supplement: 41467_2019_12148_MOESM2_ESM.pdf [file 41467_2019_12148_MOESM2_ESM.pdf]

## Description of Additional Supplementary Files

**File name:** Supplementary Movie 1

**Description:** Demonstration of LCD (ON/OFF) using the logic switching behavior of Y-OF (AND gate)
